# Supplementary material for: N-type silver ammonia-polyethyleneimine/single-walled carbon nanotube composite films with enhanced thermoelectric properties
Source: Royal Society of Chemistry journal article supplement (doi:10.1039/d3cp03906d), 2023-01-01
Supplement: d3cp03906d1.pdf [file d3cp03906d1.pdf]

1 **Supporting Information**

2

3 **N-type silver ammonia-polyethyleneimine/single-walled carbon nanotube composite**  
4 **films with enhanced thermoelectric properties**

5

6 *Zan Li, Duo Jiang, Jiayan Gong, Yi Li, Ping Fu, Yunfei Zhang\*, Feipeng Du\**

7 *School of Materials Science and Engineering, Wuhan Institute of Technology, Wuhan*

8 *430205, China*

9 *Corresponding Author (s): zyf3006@126.com (Y.F. Zhang); hsdfp@163.com (F.P. Du)*

10

11 **Materials**

12 Polyethyleneimine (PEI, molecular weight: 10,000, purity>99%) was purchased from Aladdin  
13 Industrial Corporation (Shanghai, China). Single-walled carbon nanotubes (SWCNTs,  
14 diameters: 1-3 nm, purity  $\geq 85\%$ , mixed large diameter) were purchased from Shenzhen  
15 Nanotech Port Co., Ltd. (Shenzhen, China). Silver nitrate, sodium borohydride, ethanol, and  
16 ammonia were purchased from Sinopharm Chemical Reagent Co., Ltd. (Beijing, China). All  
17 chemicals were analytical grade and used directly without further purification.

18 **Characterization**

19 The surface morphologies were characterized using a field emission scanning electron  
20 microscope (FESEM, ZEISS GeminiSEM 300, Germany). The microstructures were  
21 characterized using a transmission electron microscope (TEM, JEOL JEM-2010, Japan). The  
22 main chemical groups were characterized by Raman spectra with 532 nm excitation  
23 wavelength (Raman, DXR, USA). Element compositions were characterized by X-ray  
24 photoelectron spectroscopy (XPS, ESCALAB Xi+, USA). Thermoelectric parameters  
25 including the electrical conductivity ( $\sigma$ ) and Seebeck coefficient ( $S$ ) were characterized by TE  
26 test system (MRS variable temperature series, China), and power factor ( $PF$ ) was calculated  
27 by the formula  $PF = \sigma S^2$ . The dimensions of the samples were about 10.0 mm  $\times$  5.0 mm  $\times$  10  
28  $\mu\text{m}$ , and the temperature gradient at the collection point is set to 0.3 to 3.5  $^{\circ}\text{C}$  along the  
29 longitudinal direction of the sample. The carrier concentration and mobility were measured on

1 a Hall effect measurement system under a constant magnetic field (0.2 T) (Pasic-Hall HT50,  
2 Precision Systems Industrial Ltd., China). The output voltage and output power generated by  
3 the TE device were measured by a self-made system in the environment and are calculated by  
4 the temperature difference ( $\Delta T$ , provided by the Peltier device and determined by the T-type  
5 thermocouple) and the change of the thermoelectric voltage ( $\Delta V$ , measured with a Keithley  
6 2000 multimeter). Then, the output power ( $P$ ) of TE device was calculated by the formula  $P =$   
7  $V^2/R$ , where  $V$  and  $R$  is output voltage and external resistance, respectively.

8

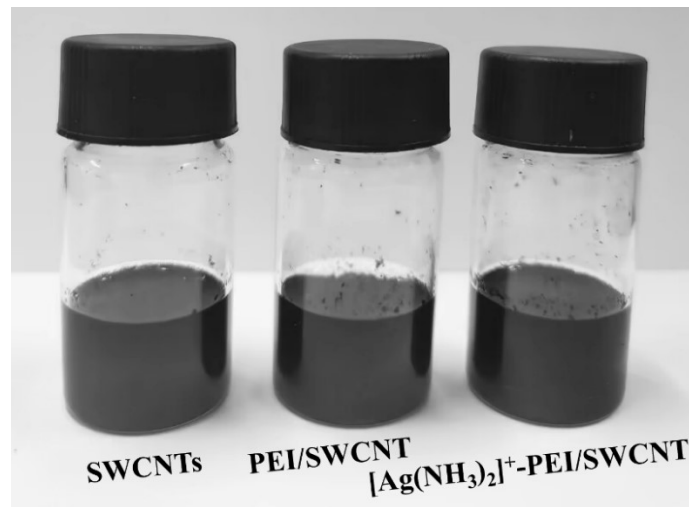

Fig. S1 dispersions of SWCNTs, PEI/SWCNT, and  $[\text{Ag}(\text{NH}_3)_2]^+$ -PEI/SWCNT.

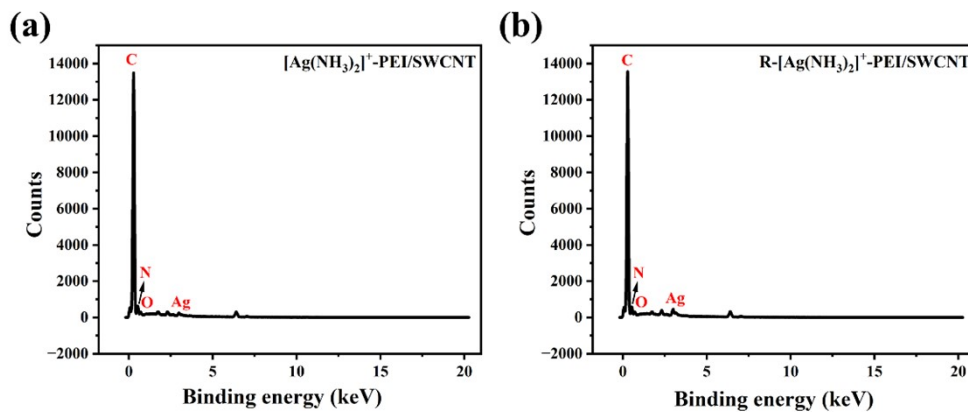

Fig. S2 EDS spectra of (a)  $[\text{Ag}(\text{NH}_3)_2]^+$ -PEI/SWCNT, (b) R- $[\text{Ag}(\text{NH}_3)_2]^+$ -PEI/SWCNT.

1

**Table S1** Density of the samples

| Sample                                                            | Carrier Type | Density (g cm <sup>-3</sup> ) |
|-------------------------------------------------------------------|--------------|-------------------------------|
| SWCNTs                                                            | p            | 0.73                          |
| 50%PEI/SWCNT                                                      | n            | 0.69                          |
| [Ag(NH <sub>3</sub> ) <sub>2</sub> ] <sup>+</sup> - PEI/SWCNT-1   | n            | 0.73                          |
| [Ag(NH <sub>3</sub> ) <sub>2</sub> ] <sup>+</sup> -PEI/SWCNT-2    | n            | 0.81                          |
| [Ag(NH <sub>3</sub> ) <sub>2</sub> ] <sup>+</sup> -PEI/SWCNT-3    | n            | 0.73                          |
| [Ag(NH <sub>3</sub> ) <sub>2</sub> ] <sup>+</sup> -PEI/SWCNT-4    | n            | 0.81                          |
| [Ag(NH <sub>3</sub> ) <sub>2</sub> ] <sup>+</sup> -PEI/SWCNT-5    | n            | 0.68                          |
| R-[Ag(NH <sub>3</sub> ) <sub>2</sub> ] <sup>+</sup> - PEI/SWCNT-1 | n            | 0.70                          |
| R-[Ag(NH <sub>3</sub> ) <sub>2</sub> ] <sup>+</sup> - PEI/SWCNT-2 | n            | 0.74                          |
| R-[Ag(NH <sub>3</sub> ) <sub>2</sub> ] <sup>+</sup> - PEI/SWCNT-3 | n            | 0.73                          |
| R-[Ag(NH <sub>3</sub> ) <sub>2</sub> ] <sup>+</sup> - PEI/SWCNT-4 | n            | 0.82                          |
| R-[Ag(NH <sub>3</sub> ) <sub>2</sub> ] <sup>+</sup> - PEI/SWCNT-5 | n            | 0.70                          |

2

3

**Table S2** Content of elements for the sample in XPS spectra

| Sample/Atomic (%)                                                | C     | O     | N    | Ag   |
|------------------------------------------------------------------|-------|-------|------|------|
| [Ag(NH <sub>3</sub> ) <sub>2</sub> ] <sup>+</sup> - PEI/SWCNT-2  | 87.43 | 3.63  | 8.26 | 0.68 |
| R-[Ag(NH <sub>3</sub> ) <sub>2</sub> ] <sup>+</sup> -PEI/SWCNT-4 | 82.43 | 12.29 | 5.17 | 0.13 |

4

5
